# Supplementary material
Source: publisher figshare collection journal article supplement (https://tandf.figshare.com/articles/dataset/_/941070)
Supplement: Supplementary file 2 [file 3]

**Figure S1.** GenBank accession numbers and sequence alignment of U5-PBS region fragment nt 109 to 261 (MAL coordinates) of CRF01\_AE (shadowed by yellow), subtype G (shadowed by blue) and CRF02\_AG (shadowed by pink) studied in the present work\*. Base changes are given as compared to the HXB2 isolate (K03455): transitions, transversions and insertions\*\* are marked by green, red and blue, respectively, deletions – by hyphen. Non-identified nucleotides are in lilac. The functional motifs discussed in the text are shadowed: 5' and 3' strands of D-duplex by pink, I-duplex by green, U-duplex by blue and GAAA apical loops by turquoise. A portion of 5' strand of U5/AUG duplex and 5'-terminal CU of DIS hairpin as they are presented in the BMH structure model of the complete HIV-1 5'-UTR (Abbink & Berkhout, 2003) are shadowed by yellow. The PBS motif **tggcgcccgaaacagggac\*\*\*** is omitted. Accession numbers of the sequences annotated as subtype reference sequences in the Los Alamos HIV sequence database are in bold.

|          |         |         |                                          |          |            |                 |                               |                        |                        |        |       |
|----------|---------|---------|------------------------------------------|----------|------------|-----------------|-------------------------------|------------------------|------------------------|--------|-------|
| K03455   | cgctctg | ttgtg   | tgactctggttaactagagatccctcag             | accctttt | agtcagtgtg | gaaaatctctagcag | ctgaaagcgaaaggg               | aaacagagaggagctctctc   | gacgca                 | ggact  |       |
| AF070521 | cgctctg | ttgtg   | tgactctggttaactagagatccctcag             | accctttt | agtcagtgtg | gaaaatctctagcag | ttgaaagcgaaagta               | aagccagagaggagattctctc | gacgca                 | ggact  |       |
| X04415   | catctg  | ttgtg   | tgactctggttaactagagatccctcag             | accactct | agacggtgta | -aaaatctctagcag | tttaagagtgaagtt-aaacagggactcg | aaagcggaag             | tt---ccagagaagttctctc  | gacgca | ggact |
| AB032740 | cgctctg | tggtta  | agactctggttaactagagatccctcag             | accactct | agactgagta | -aaaatctctagcag | ttgaaagcgaaagttaaatagggactcg  | aaagcggaag             | tt---ccagagaagttctctc  | gacgca | ggact |
| AB032741 | cgctctg | tggtta  | ggactctggttaactagagatccctcag             | accactct | agactgagta | -aaaatctctagcag | ttgaaagtgaagttaaatagggactcg   | aaagcggaag             | tt---ccagagaagttctctc  | gacgca | ggact |
| AB052995 | cgctctg | tggtta  | ggactctggttaactagagatccctcag             | accactct | agactgaata | -aaaatctctagcag | ttgaaagcgaaagttaaatagggactcg  | aaagcggaag             | tt---ccagagaagttctctc  | gacgca | ggact |
| AB070352 | cgctctg | tggtta  | ggactctggttaactagagatccctcag             | accactct | agactgagta | -aaaatctctagcag | ttgaaagcgaaagttaaatagggactcg  | aaagcggaag             | tt---ccagagaagttctctc  | gacgca | ggact |
| AB220944 | cgctctg | tggtta  | ggactctggttaactagagatccctcag             | accactct | agactgagta | -aaaatctctagcag | ttgaaagtgaagttaaatagggactcg   | aaagcggaag             | tt---ccagagaagttctctc  | gacgca | ggact |
| AB220945 | cgctctg | tggtta  | ggactctggttaactagagatccctcag             | accactct | agattgagtg | -aaaatctctagcag | ttgaaagcgaaagttaaatagggactcg  | aaagcggaag             | tt---ccagagaagttctctc  | gacgca | ggact |
| AB220946 | cgctctg | tggtta  | ggactctggttaactagagatccctcag             | accactct | agactgagta | -aaaatctctagcag | ttgaaagcgaaagttaaatagggactcg  | aaagcggaag             | tt---ccagagaagttctctc  | gacgca | ggact |
| AB220947 | cgctctg | tggtta  | ggactctggttaactagagatccctcag             | accactct | agactgagta | -aaaatctctagcag | ttgaaagcgaaagttaaatagggactcg  | aaagcggaag             | tt---ccagagaagttctctc  | gacgca | ggact |
| AB220948 | cgctctg | tggtta  | ggactctggttaactagagatccctcag             | accactct | agactgagt- | -aaaatctctagcag | ttgaaagcgaaagttaaatagggactcg  | aaagcggaag             | tt---ccagagaagttctctc  | gacgca | ggact |
| AB253423 | cgctctg | tggtta  | ggactctggttaactagagatccctcag             | accactct | agactgagta | -aaaatctctagcag | ttgaaagtgaagttaaatagggactcg   | aaagcggaag             | tt---ccagagaagttctctc  | gacgca | ggact |
| AB253424 | cgctctg | tggtta  | ggactctggttaactagagatccctcag             | accactct | agattgagt- | -aaaatctctagcag | ctgaaagcgaaagttaaatagggactcg  | aaagcggaag             | tt---ccagagaagttctctc  | gacgca | ggact |
| AB253426 | catctg  | tggtta  | ggactctggttaactagagatccctcag             | accactct | agactgagta | -aaaatctctagcag | ttgaaagtgaagttaaatagggactcg   | aaagcggaag             | tt---ccagagaagttctctc  | gacgca | ggact |
| AB253635 | catctg  | tggtta  | ggactctggttaactagagatccctcag             | accactct | agactgagta | -aaaatctctagcag | ttgaaagcgaaagttaaatagggactcg  | aaagcggaag             | tt---ccagagaagttctctc  | gacgca | ggact |
| AB253647 | catctg  | tggtta  | ggactctggttaactagagatccctcag             | accactct | agactgagta | -aaaatctctagcag | ctgaaagcgaaagttaaatagggactcg  | aaagcggaag             | tt---ccagagaagttctctc  | gacgca | ggact |
| AB253659 | catctg  | tggtta  | ggactctggttaactagagatccctcag             | accactct | agactgagta | -aaaatctctagcag | ttgaaagcgaaagttaaatagggactcg  | aaagcggaag             | tt---ccagagaagttctctc  | gacgca | ggact |
| AB253669 | catctg  | tggtta  | ggactctggttaactagagatccctcag             | accactct | agactgagta | -aaaatctctagcag | ttgaaagcgaaagttaaatagggactcg  | aaagcggaag             | tt---ccagagaagttctctc  | gacgca | ggact |
| AB253692 | cgctctg | tggtta  | ggactctggttaactagagatccctcag             | accactct | agactgagta | -aaaatctctagcag | ttgaaagtgaagttaaatagggactcg   | aaagcggaag             | tt---ccagagaagttctctc  | gacgca | ggact |
| AB253703 | cgctctg | tggtta  | ggactctggttaactagagatccctcag             | accactct | agactgagta | -aaaatctctagcag | ttgaaagtgaagttaaatagggactcg   | aaagcggaag             | tt---ccagagaagttctctc  | gacgca | ggact |
| AB253717 | catctg  | tggtta  | ggactctggttaactagagatccctcag             | accactct | agactgagta | -aaaatctctagcag | tcgaaagtgaagttaaatagggactcg   | aaagcggaag             | tt---ccagagaagttctctc  | gacgca | ggact |
| AB485652 | cgctctg | tggtta  | ggactctggttaactagagatccctcag             | accactct | agactgagt- | -aaaatctctagcag | ttgaaagcgaaagttaaatagggactcg  | aaagcggaag             | tt---ccagagaagttctctc  | gacgca | ggact |
| AB485653 | cgctctg | tggtta  | ggactctggttaactagagatccctcag             | accactct | agactgagt- | -aaaatctctagcag | ttgaaagcgaaagttaaatagggactcg  | aaagcggaag             | tt---ccagagaagttctctc  | gacgca | ggact |
| AB485654 | cgctctg | tggttt  | ggactctggttaactagagatccctcag             | accactct | agactgagta | -aaaatctctagcag | ttgaaagtgaagttaaatagggactcg   | aaagcggaag             | tt---ccagagaagttctctc  | gacgca | ggact |
| AB485655 | catctg  | tggtta  | ggactctggttaactagagatccctcag             | accactct | agactgagta | -aaaatctctagcag | ttgaaagtgaagttaaatagggactcg   | aaagcggaag             | tt---ccagagaagttctctc  | gacgca | ggact |
| AB565503 | cgctctg | tggtta  | ggactctggttaactagagatccctcag             | accactct | agactgagta | -aaaatctctagcag | ttgaaagcgaaagttaaatagggactcg  | aaagcggaag             | tt---ccagagaagttctctc  | gacgca | ggact |
| AF164485 | cgctctg | tggtta  | ggactctggttaacta <sup>aa</sup> atccctcag | accactct | agactgagta | -aaaatctctagcag | ttgaaagcgaaagtctaatagggactcg  | aaagcggaag             | tt---ccagagaagttctctc  | gacgca | ggact |
| AF197339 | cgctctg | tggtta  | ggactctggttaactagagatccctcag             | accactct | agactgagt- | -aaaatctctagcag | tagaaagcgaaagttaaatagggactcg  | aaagcggaag             | tt---ccagagaagttctctc  | gacgca | ggact |
| AF197340 | cgctctg | tgata   | ggactctggttaactagagatccctcag             | accactct | agactgagta | -aaaatctctagcag | ttgaaagcgaaagttaaatagggactcg  | aaagcggaag             | tt---ccagagaagttctctc  | gacgca | ggact |
| AF197341 | cgctctg | tgata   | ggactctggttaactagagatccctcag             | accactca | agactgagta | -aaaatctctagcag | ttgaaagcgaaagttaaacagggactcg  | aaagcggaag             | tt---ccagagaagttctctc  | gacgca | ggact |
| AF259954 | cgctctg | tggtg   | ggactctggttaactagagatccctcag             | accactct | agactgagt- | -aaaatctctagcag | ttgaaagcgaaagttaaatagggactcg  | aaagcggaag             | tt---ccagagaagttctctc  | gacgca | ggact |
| DQ314731 | cgctctg | tggttt  | ggactctggttaactagagatccctcag             | accactct | agactgagta | -aaaatctctagcag | ttgaaagcgaaagttaaatagggactcg  | aaagcggaag             | tt---ccagagaagttctctc  | gacgca | ggact |
| DQ314732 | cgctctg | tggttt  | ggactctggttaactagagatccctcag             | accactct | agactgagta | -aaaatctctagcag | ttgaaagcgaaagttaaatagggactcg  | aaagcggaag             | tt---ccagagaagttctctc  | gacgca | ggact |
| DQ859178 | catctg  | tggtta  | ggactctggttaactagagatccctcag             | accactct | agactgagta | -aaaatctctagcag | ttgaaagtgaagttaaatagggactcg   | aaagcggaag             | tt---ccagagaagattctctc | gacgca | ggact |
| DQ859179 | cgctctg | tggtta  | ggactctggttaactagagatccctcag             | accactct | agattgagta | -aaaatctctagcag | ttgaaagcgaaagttaaatagggactcg  | aaagcggaag             | tt---ccagagaagttctctc  | gacgca | ggact |
| DQ859180 | cgctctg | tggtta  | ggactctggttaactagagatccctcag             | ac-actgc | agttgagta  | -aaaatctctagcag | ttgaaagcgaaagttaaatagggactcg  | aaagcggaag             | tt---ccagagaagttctctc  | gacgca | ggact |
| EF036527 | catctg  | tggtta  | ggactctggttaactagagatccctcag             | accactct | agactgagta | -aaaatctctagcag | ttgaaagcgaaagttaaatagggactcg  | aaagcggaag             | tt---ccagagaagttctctc  | gacgca | ggact |
| EF036528 | cgctctg | tggttt  | ggactctggttaactagagatccctcag             | accactct | agactaagta | -aaaatctctagcag | ttgaaagcgaaagttaaatagggactcg  | aaagcggaag             | tt---ccagagaagttctctc  | gacgca | ggact |
| EF036529 | catctg  | tggtta  | ggactctggttaactagagatccctcag             | accactcc | agactgagta | -aaaatctctagcag | ttgaaagcgaaagttaaatagggactcg  | aaagcggaag             | tt---ccagagaagttctctc  | gacgca | ggact |
| EF036530 | catctg  | tggtta  | ggactctggttaactagagatccctcag             | accactct | agactgagta | -aaaatctctagcag | ttgaaagcgaaagttaaatagggactcg  | aaagcggaag             | tt---ccagagaagttctctc  | gacgca | ggact |
| EF036531 | catctg  | tggtta  | ggactctggttaactagagatccctcag             | accactct | agactgagta | -aaaatctctagcag | ttgaaagcgaaagttaaatagggactcg  | aaagcggaag             | tt---ccagagaagttctctc  | gacgca | agact |
| EF036532 | cgctctg | tggtta  | ggactctggttaactagagatccctcag             | accactct | agactaagta | -aaaatctctagcag | tcgaaagcgaaagttaaatagggactcg  | aaagcggaag             | tt---ccagagaagttctctc  | gacgca | ggact |
| EF036533 | cgctctg | tggtta  | ggactctggttaactagagatccctcag             | accactct | agactaagta | -aaaatctctagcag | ttgaaagcgaaagttaaatagggactcg  | aaagcggaag             | tt---ccagagaagttctctc  | gacgct | ggact |
| EF036534 | cgctctg | tggtta  | ggactctggttaactagagatccctcag             | accactct | agactgagta | -aaaatctctagcag | cttgaagcggaagttaaatagggactcg  | aaagcggaag             | tt---ccagagaagttctctc  | gacgca | ggact |
| EF036535 | catctg  | tggtta  | ggactctggttaactagagatccctcag             | accactct | agactgagta | -aaaatctctagcag | ttga--gtgacagttaaatagggactcg  | aaagcggaag             | tt---ccagagaagttctctc  | gacgca | ggact |
| EF036536 | catctg  | tggttaa | ggactctggttaactagagatccctcag             | accactct | agactgagta | -aaaatctctagcag | ttgaaagcgaaagttaaatagggactcg  | aaagcggaag             | tt---ccagagaagttctctc  | gacgca | ggact |
| JX446666 | cgctctg | tggtta  | ggactctggttaactagagatccctcag             | accactct | agactgagta | -aaaatctctagcag | ttgaaagcgaaagt-taaagggactcg   | aaagcggaag             | tt---ccagagaagttctctc  | gacgca | ggact |
| JX447127 | cgctctg | tggtta  | ggactctggttaactagagatccctcag             | accactct | agactgagt- | -aaaatctctagcag | ttgaaagtgaagttaaatagggactcg   | aaagcggaag             | tt---ccagagaagttctctc  | gacgca | ggact |
| JX447349 | -gtctg  | tggtta  | ggactctggttaactagagatccctcag             | accactct | agactgagta | -aaaatctctagcag | ttgaaagcgaaagttaaatagggactcg  | aaagcggaag             | tt---ccagagaagttctctc  | gacgca | ggact |

|          |        |       |     |         |          |              |                 |                 |                 |           |           |           |                  |         |         |       |
|----------|--------|-------|-----|---------|----------|--------------|-----------------|-----------------|-----------------|-----------|-----------|-----------|------------------|---------|---------|-------|
| JX447539 | cgtctg | tg    | gga | ccctcag | accactct | agactgagt-   | -aaaatctctagcag | ttgaaagcgaag    | tt              | aaagcgaag | tt        | ccagagaag | ttctctc          | gacgca  | ggact   |       |
| JX447638 | -gtctg | tg    | gga | ccctcag | accactct | agactgagta   | -aaaatctctagcag | ttgaaagcgaag    | tt              | aaagcgaag | tt        | ccagagaag | ttctctc          | gacgca  | ggact   |       |
| U51188   | cgtctg | tg    | gga | ccctcag | accactct | agactgagta   | -aaaatctctagcag | ttgaaagcgaag    | tt              | aaagcgaag | tt        | ccagagaag | ttctctc          | gacgca  | ggact   |       |
| U51189   | catctg | tg    | gga | ccctcag | atcactct | agactgagta   | -aaaatctctagcag | ttgaaagcgaag    | tt              | aaagcgaag | tt        | ccagagaag | ttctctc          | gacgca  | ggact   |       |
| U54771   | cgtctg | tg    | gga | ccctcag | accactct | agactgagta   | -aaaatctctacag  | tcgaaagcgaag    | tt              | aaagcgaag | tt        | ccagagaag | ttctctc          | gacgca  | ggact   |       |
| AB231893 | cgtctg | ttgtg | tg  | ccctcag | accactct | agacagtgtgta | -aaaatctctagcag | ccgaaagtgaag    | tt              | aaagcgaag | tt        | ccagagaag | ttctctc          | gacgca  | ggact   |       |
| AB485662 | cgtctg | ttgtg | tg  | ccctcag | accactct | agatagtgta   | -aaaatctctagcag | ttgaaagtga      | g               | aaagcgaag | tt        | ccagagaag | atctctc          | gacgca  | ggact   |       |
| AF084936 | cgtctg | ttgtg | tg  | ccctcag | accactct | agatagtgta   | -aaaatctctagcag | ttgaaaacgaag    | tt              | aaagcgaag | tt        | ccagagaag | ttctctc          | gacgca  | ggact   |       |
| AY586547 | cgtctg | ttgtg | tg  | ccctcag | accactct | agacgggtgta  | -aaaatctctagcag | ttgaaagcgaag    | tt              | aaagcgaag | tt        | ccagagaag | ttctctc          | gacgca  | ggact   |       |
| AY586549 | cgtctg | ttgtg | tg  | ccctcag | accactct | agacagtgtgta | -aaaatctctagcag | ttgaaagcgaag    | tt              | aaagcgaag | tt        | ccagagaag | ttctctc          | gacgca  | ggact   |       |
| AY612637 | cgtctg | ttgtg | tg  | ccctcag | accactct | agatagtgta   | -aaaatctctagaa  | ttgaaagcgaag    | tt              | aaagcgaag | tt        | ccagagaag | ttctctc          | gacgca  | ggact   |       |
| AY772535 | cgtctg | ttgtg | tg  | ccctcag | accactct | agacagtgtgta | -aaaatctctagcag | ttgaaagcgaag    | tt              | aaagcgaag | tt        | ccagagaag | ttctctc          | gacgca  | ggact   |       |
| EU786670 | cgtctg | ttgtg | tg  | ccctcag | accactct | agacagata    | -aaaatctctagcag | ttgaaaacgaag    | tt              | aaagcgaag | tt        | ccagagaag | ttctctc          | gacgca  | ggact   |       |
|          |        |       |     |         |          |              |                 |                 |                 | aa        | aaagcgaag | tt        | ccagagaag        | ttctctc | gacgca  | ggact |
| FJ389363 | cgtctg | ttgtg | cg  | ccctcag | accactct | agatagtgta   | -aaaatctctagcag | ttgaaaacgaag    | tt              | aaagcgaag | tt        | ccagagaag | ttctctc          | gacgca  | ggact   |       |
| FJ389364 | cgtctg | tt    | tg  | ccctcag | accactct | a            | acagtgtgta      | -aaaatctctagcag | ttgaaaacgaag    | tt        | aaagcgaag | tt        | ccagagaag        | atctctc | gacgca  | ggact |
| FJ389366 | cgtctg | ttgtg | tg  | ccctcag | accactc  | agacagtgtgta | -aaaatctctagcag | ttgaaaacgaag    | tt              | aaagcgaag | tt        | ccagagaag | ttctctc          | gacgca  | ggact   |       |
| FJ389367 | cgtctg | ttgtg | tg  | ccctcag | accactct | agacagtgtgta | -aaaatctctagcag | ttgaaaacgaag    | tt              | aaagcgaag | tt        | ccagagaag | ttctctc          | gacgca  | ggact   |       |
| FJ670520 | cgtctg | ttgtg | tg  | ccctcag | accactaa | aagaggtgtgta | -aaaatctctagcag | ttgaaagtgaag    | tt              | aaagcgaag | tt        | ccagagaag | ttctctc          | gacgca  | ggact   |       |
| FJ670530 | cgtctg | ttgtg | tg  | ccctcag | accactct | aggtagtgta   | -aaaatctctagcag | ttgaaagagaa     | tt              | aaagcgaag | tt        | ccagagaag | ttctctc          | gacgca  | ggact   |       |
| FR846408 | cgtctg | ttgtg | tg  | ccctcag | accactct | agacagtgtgta | -aaaatctctagcag | ctgaaagcgaag    | tt              | aaagcgaag | tt        | ccagagaag | ttctctc          | gacgca  | ggact   |       |
| FR846409 | cgtctg | ttgtg | tg  | ccctcag | accactct | aaacagtgtgta | -aaaatctctagcag | ttggaagcgaag    | tt              | aaagcgaag | tt        | ccagagaag | ttctctc          | gacgca  | ggact   |       |
| GU362882 | cgtctg | ttgtg | tg  | ccctcag | accactct | agttagtgta   | -aaaatctctagcag | ttgaaagcgaag    | tt              | aaagcgaag | tt        | ccagagaag | ttctctc          | gacgca  | ggact   |       |
| GU362884 | cgtctg | ttgt  | tg  | ccctcag | accactct | agatagtgta   | -aaaatctctagcag | ttgaaaacgaag    | tt              | aaagcgaag | tt        | ccagagaag | ttctctc          | gacgca  | ggact   |       |
| AB049811 | cgtctg | ttgtg | tg  | ccctcag | actactct | agactgtgtgta | -aaaatctctagcag | ttgaa           | g               | aaagcgaag | tt        | ccagagaag | ttctctc          | gacgca  | ggact   |       |
| AB231895 | cgtctg | ttgtg | tg  | ccctcag | accactct | agactgtgtgta | gaaaatctctagcag | ttgaa           | g               | aaagcgaag | tt        | ccagagaag | ttctctc          | cgacgca | g       |       |
|          |        |       |     |         |          |              |                 |                 |                 | tcg       | aaagcgaag | tt        | ccagagaag        | ctctctc | gacgcag | ggact |
| AB231896 | cgtctg | ttgtg | tg  | ccctcag | actacttt | agtcagtgtgta | -aaaatctctagcag | cggaa           | g               | aaagcgaag | tt        | ccagagaag | atctctc          | gacgcac | ggact   |       |
| AB231898 | cgtctg | ttgtg | tg  | ccctcag | accattt  | agtc         | ttgtgta         | -aaaatctctagcag | cggaa           | g         | aaagcgaag | tt        | ccagagaag        | -atctc  | gacgcac | ggact |
| AB286855 | cgtctg | ttgtg | tg  | ccctcag | accactgt | agactgtgtgta | aaaaatctctagcag | ctgaa           | g               | aaagcgaag | tt        | ccagagaag | ttctctc          | gacgcag | ggact   |       |
| AB286857 | cgtctg | ttgtg | tg  | ccctcag | accacttt | actcagtgtgta | -aaaatctctagcag | cggaa           | g               | aaagcgaag | tt        | ccagagaag | ttctctc          | gacgcac | ggact   |       |
| AB286859 | cgtctg | ttgtg | tg  | ccctcag | accactct | agactgtgtgta | gaaaatctctagcag | ttgaa           | g               | aaagcgaag | tt        | ccagagaag | ctctctc          | gacgcag | ggact   |       |
| AB286861 | cgtctg | ttgtg | tg  | ccctcag | accacttt | cagttgtgtgta | -aaaatctctagcag | cggaa           | g               | aaagcgaag | tt        | ccagagaag | ctctctc          | gacgcag | ggact   |       |
| AB286863 | cgtctg | ttgtg | tg  | ccctcag | actactct | agacgggtg-   | -aaaatctctagcag | ttgga           | g               | aaagcgaag | tg        | ccagagaag | atctctc          | gacgcag | ggact   |       |
| AB286864 | cgtctg | ttgtg | cg  | ccctcag | actactct | agacgggtgta  | -aaaatctctagcag | ttgga           | g               | aaagcgaag | tg        | ccagagaag | atctctc          | gacgcag | ggact   |       |
| AB485633 | cgtcta | ttgtg | tg  | ccctcag | accactct | agactgtgtgta | gaaaatctctagcag | cggaa           | g               | aaagcgaag | tt        | ccagagaag | ctctctc          | gacgcag | ggact   |       |
| AB485634 | cgtctg | ttgtg | tg  | ccctcag | accactct | aggttgtgtgta | aaaaatctctagcag | ttgaa           | g               | aaagcgaag | tt        | ccagagaag | atctctc          | gacgcag | ggact   |       |
| AB485635 | cgtctg | ttgtg | tg  | ccctcag | accactct | aggttgtgtgta | aaaaatctctagcag | cggaa           | g               | aaagcgaag | tt        | ccagagaag | atctctc          | gacgcag | ggact   |       |
| AB485636 | cgtctg | ttgtg | tg  | ccctcag | accactct | agactgtata   | -aaaatctctagcag | ttgaa           | g               | aaagcgaag | tt        | ccagg     | -agctctc         | gacgcag | ggact   |       |
| AY271690 | cgtctg | ttgtg | tg  | ccctcag | accacttt | agactgtgtgta | -aaaatctctagcag | ttgaa           | g               | aaagcgaag | tt        | ccagagaag | atctctc          | gacgcac | ggact   |       |
| EU786671 | cgtctg | ttgtg | tg  | ccctcag | accactct | agacttagtg   | aaaaatctctagcag | cggaa           | g               | aaagcgaag | tt        | ccagagaag | ctctctc          | gacgcag | ggact   |       |
| EU884501 | cgtctg | ttgtg | tg  | ccctcag | accactcg | agacgggtgta  | gaaaatctctagcag | cggaa           | g               | aaagcgaag | tt        | ccagagaag | atctctc          | gacgcag | ggact   |       |
| JQ316136 | cgtctg | ttgtg | tg  | ccctcag | accatttt | agctt        | ggta            | g               | -aaaatctctagcag | ttgaa     | g         | aaagcgaag | ctctctt          | gacgcag | ggact   |       |
| JQ316137 | cgtctg | ttgtg | tg  | ccctcag | accattct | agctt        | ggta            | -aaaatctctagcag | ttgaa           | g         | aaagcgaag | tt        | ccagagaag        | ctctctt | gacgcag | ggact |
| JQ316138 | cgtctg | ttgtg | tg  | ccctcag | accattat | agctt        | ggta            | -aaaatctctagcag | ttgag           | g         | aaagcgaag | tt        | ccagagaag        | ctctctt | gacgcag | ggact |
| L39106   | cgtctg | ttgtg | tg  | ccctcag | accactct | agactgtgtgta | -aaaatctctagcag | ttgac           | g               | aaagcgaag | tt        | ccagagaag | atctctc          | gacgcag | ggact   |       |
| K03455   | cgtctg | ttgtg | tg  | ccctcag | accctttt | agtcagtgtg   | gaaaatctctagcag | ctgaaagcgaaggg  |                 |           |           | aaac      | ccagaggagctctctc | gacgca  | ggact   |       |

- \* The 52 isolates of CRF01\_AE used in the present work have been sampled from at least 43 patients residing in 5 countries (CAR, Thailand, Indonesia, Japan and China); the 18 isolates of subtype G - from 18 different patients residing in 7 countries (Kenya, Cameroon, Ghana, Belgium, Spain, Portugal and Cuba); the 21 isolates of CRF02\_AG - from 17 different patients residing in 7 countries (Liberia, Cameroon, Nigeria, Ghana, Spain, France and South Korea).
- \*\* As compared to the MAL isolate and some isolates of A1/A2 subgroup, for example, AB253421, AB253428, AF107771, AF286237, AY322190, closely clustering with the MAL isolate in PBS region, all MAL-like isolates studied in the present work (except for the CRF01\_AE isolate JX446666) contain an additional nucleotide U between U210 and the first nucleotide A211 of the duplicate insertion. As compared to HXB2, this nucleotide is marked by red (G214U transversion). Following the nucleotide numbering of the MAL isolate (Baudin et al., 1993; Goldschmidt et al., 2002; Goldschmidt et al., 2004; Isel et al., 1995; Isel et al., 1998; Isel et al., 1999; Isel et al., 2010; Sleiman et al., 2012), this additional nucleotide may be considered as an insertion.
- \*\*\* Among all MAL-like templates studied in the present work are four isolates with a single mutation in the PBS sequence: EF036531 (tggtgccccgaacagggac), EF036534 (-ggcgccccgaacagggac), U54771 (tggcgccccgaacagggac) and L39106 (tggcgccccgaacagg-ac). The subtype G isolate (EU786670) contains a doubled duplicate insertion and the CRF02\_AG isolate (AB231895) contains a repeat of a larger portion of the duplicate insertion and a downstream sequence up to the 5'-end of DIS hairpin.
